# Supplementary material for: Safety of misoprostol vaginal insert for labor induction using standard vs. adjusted retrieval criteria: a comparative cohort study
Source: publisher site journal article supplement (doi:10.1515/jpm-2020-0071), 2020-05-14
Supplement: Supplementary file 1 [file Contract Ferring Misodel.pdf › Supplement/Contract Ferring Misodel.pdf]

# VEREINBARUNG ÜBER EINE PRÜFER-INITIIERTE STUDIE (INVESTIGATOR-INITIATED STUDY, IIT)

## **Ferring Arzneimittel GmbH**

Fabrikstr. 7, 24103 Kiel, vertreten durch die Geschäftsführerin  
im Folgenden als „Ferring“ bezeichnet

und

## **Asklepios Kliniken Hamburg GmbH**

vertreten durch die Geschäftsführung, diese wiederum vertreten durch die Leiterin von Asklepios proresearch  
Klinische Forschung und Entwicklung, Lohmühlenstr. 5, Haus J, 20099 Hamburg  
im Folgenden als „Institution“ bezeichnet

treffen die vorliegende Vereinbarung.

## IN ERWÄGUNG NACHSTEHENDER GRÜNDE:

Die Institution plant, in eigener Verantwortung und gemäß den in dieser Vereinbarung dargelegten  
Vertragsbedingungen eine Prüfer-initiierte Studie (investigator-initiated study, IIT) durchzuführen.

Die Institution hat Ferring das in Anhang A beigefügte Forschungsvorhaben mit dem Titel

**OBSERVATION AND EVALUATION OF MISOPROSTOL VAGINAL INSERT (MISODEL®)  
FOR INDUCTION OF LABOR IN CLINICAL PRACTICE**

unterbreitet.

Ferring erklärt sich dazu bereit, das Forschungsprojekt gemäß den in dieser Vereinbarung dargelegten Vertrags-  
bedingungen zu unterstützen, indem es die Finanzierung bereitstellt, wie dies weiter unten festgelegt wird.

## HIERMIT WIRD FOLGENDES VEREINBART:

### Artikel 1 - VERPFLICHTUNGEN

1. Das Forschungsvorhaben wird im Studienprotokoll und anderen forschungsrelevanten Informationen (im Anhang A beigefügt) beschrieben und enthält eine vollständige Beschreibung des vorgeschlagenen Forschungsprojektes. Hierzu gehören unter anderem die Forschungsziele, die Forschungsmethoden, die Vorgehensweise, die Kosten und die Zeitpläne, die zum Zeitpunkt der Bewilligung als angemessen erachtet werden. Die Institution muss Ferring alle Änderungen am Studienprotokoll und den übrigen forschungsrelevanten Dokumenten, die die Durchführung des Forschungsvorhabens oder den Einsatz der Studienmedikation beeinflussen können, vor Implementierung schriftlich zukommen lassen. Falls es Widersprüche zwischen dem Forschungsprojekt und dieser Vereinbarung gibt, gelten im Verhältnis zwischen der Institution und Ferring die Vertragsbedingungen dieser Vereinbarung.
2. Die Institution muss sich nach besten Kräften darum bemühen, seinen Verpflichtungen aus dieser Vereinbarung nachzukommen.
3. Mit der Durchführung der Studie soll als Prüfer betraut werden: Prof. Dr med. Peter Schwärzler, Chefarzt Geburtshilfe, Pränatalmedizin und Gynäkologie, Asklepios Klinik Barmbek, Rübenkamp 220, 22291 Hamburg. Der Prüfer bestätigt mit seiner Unterschrift, dass er die vorliegende Vereinbarung zur Kenntnis genommen hat und anerkennt, an deren Inhalt, soweit sie für ihn Verpflichtungen statuiert, gebunden zu sein.
4. Das Forschungsprojekt, das die Institution durchführt und das von Ferring unterstützt wird, ist nicht verkaufsorientiert und die Unterstützung dieses Forschungsprojekts verpflichtet unter keinen Umständen dazu, Produkte von Ferring zu erwerben, zu verschreiben oder anderweitig zu unterstützen.

# VEREINBARUNG ÜBER EINE PRÜFER-INITIIERTE STUDIE

5. Diese Vereinbarung enthält keinerlei Bestimmungen, die Ferring innerhalb der Laufzeit dieser Vereinbarung oder darüber hinaus daran hindern, eigenständig oder durch Dritte Studien durchzuführen, die den Studien dieses Forschungsprojektes ähneln.

## Artikel 2 – DURCHFÜHRUNG UND VERANTWORTLICHKEIT

1. Die Institution ist der alleinige Sponsor des Forschungsprojektes und übernimmt die volle Verantwortung hierfür. Die Institution trägt die alleinige Verantwortung für die Erstellung und Einhaltung des Studienprotokolls, der Patienteninformationen, Einwilligungserklärungen, der Prüfbögen und der sonstigen forschungsrelevanten Dokumente.
2. Die Institution ist für die Einhaltung aller geltenden Richtlinien und Vorschriften verantwortlich. Hierzu gehören insbesondere die Richtlinien des International Conference of Harmonization (ICH) für gute klinische Praxis (Good Clinical Practice, GCP), die EU-Richtlinie 2001/20/EG zur Durchführung klinischer Studien und die jeweils geltenden nationalen Gesetze und Verordnungen für die Durchführung klinischer Studien, sowie die Deklaration von Helsinki. Die Institution muss insbesondere alle geltenden Vorschriften und gesetzlichen Anforderungen zum Schutz der Teilnehmer an klinischen Studien einhalten.
3. Die Institution muss dafür sorgen, dass alle unerwünschten Ereignisse (Adverse Events) gemäß den geltenden gesetzlichen Bestimmungen erfasst und, falls erforderlich, den Aufsichtsbehörden und Ethikkommissionen gemeldet werden.
4. Die Institution ist dafür verantwortlich, alle schwerwiegenden unerwünschten Ereignisse gemäß den Bestimmungen des Studienprotokolls sofort zu melden. Um zu gewährleisten, dass Ferring alle relevanten Sicherheitsdaten kennt, müssen die Berichte (Erstberichte und Folgeberichte) zu allen schwerwiegenden (Serious Adverse Drug Reactions) und unerwarteten Nebenwirkungen innerhalb von 24 Stunden nach deren Bekanntwerden an die Abteilung für Arzneimittelsicherheit von Ferring gefaxt werden (0431 5852-34).
5. Die Institution muss in Übereinstimmung mit den vor Ort geltenden gesetzlichen Bestimmungen die Anzeige bzw. Genehmigung bei der zuständigen Behörde und der zuständigen Ethikkommission für das Forschungsprojekt tätigen bzw. einholen. Vor Beginn der Unterstützung durch Finanzierung muss Ferring die Unterlagen der behördlichen Anzeige bzw. Genehmigung und zur Befürwortung durch die zuständige Ethikkommission erhalten.
6. Die Institution wird für die Information der Studienteilnehmer sorgen, indem sie vor dem Einschluss der einzelnen Studienteilnehmer in das Forschungsprojekt und in Übereinstimmung mit den geltenden gesetzlichen Bestimmungen deren schriftliche Einverständniserklärung und Genehmigung zur Verwendung und Weitergabe von pseudonymisierten Gesundheitsdaten einholt. Die Institution trägt die Verantwortung für eine ausreichende Einverständniserklärung. Ferring wird dieses Dokument oder diese Daten nicht überprüfen und sich nicht dazu äußern.
7. Die Institution erklärt und garantiert, dass keiner, der in Verbindung mit dem Forschungsprojekt beschäftigt oder beauftragt wird, durch ein förmliches Verfahren von der Durchführung von Forschungsprojekten dieser Art ausgeschlossen ist oder Gegenstand von Ermittlungen oder Verfahren ist, die zu einem solchen Ausschluss führen können. Die Institution wird Ferring sofort schriftlich darüber in Kenntnis setzen, wenn sie von einem solchen Ausschluss, solchen Ermittlungen oder einem solchen Verfahren in Bezug auf der Institution oder anderer Personen, die in Verbindung mit dem Forschungsprojekt beschäftigt oder beauftragt werden, erfährt.
8. Falls zutreffend, muss die Institution das Forschungsprojekt vor dem Einschluss der Studienteilnehmer in das Forschungsprojekt bei der zuständigen landesweiten/staatlichen Behörde registrieren und ist dafür verantwortlich, dass die gesetzlichen Anforderungen im Zusammenhang mit der behördlichen Registrierung des Forschungsprojektes erfüllt werden. Ferring erhält eine Kopie der Registernummer.



# VEREINBARUNG ÜBER EINE PRÜFER-INITIIERTE STUDIE

## Artikel 3 – UNTERSTÜTZUNGSLEISTUNG

Ferring bezahlt einen Gesamtbetrag in Höhe von € 30.000 zuzügl. gesetzliche MwSt. um der Institution bei dem Forschungsprojekt folgendermaßen zu unterstützen:

- a) Nach Erhalt eines schriftlichen Nachweises über die Einreichung des Studienprotokolls und aller sonstigen erforderlichen Unterlagen bei der zuständigen Ethikkommission wird Ferring, bei ordnungsgemäßigem Zustandekommen dieser Vereinbarung, eine Anschub- Finanzierung in Höhe von € 10.000 leisten.
  - b) Hat Ferring den schriftlichen Nachweis über die Befürwortung durch die zuständige Ethikkommission sowie über die Anzeige bei der zuständigen Behörde (hier Bundesinstitut für Arzneimittel und Medizinprodukte, BfArM) erhalten, wird ein weiterer Betrag in Höhe von € 5.000 gezahlt.
  - c) Nach Dokumentation von 100 Patienten wird ein weiterer Betrag in Höhe € 10.000 gezahlt. Als Nachweis erhält Ferring einen anonymisierten Auszug aus der Patientendatenbank.
  - d) Hat Ferring den Nachweis darüber erhalten, dass das Forschungsprojekt abgeschlossen wurde, wird der Restbetrag in Höhe von € 5.000 gezahlt. Der Nachweis über den Abschluss des Forschungsprojekts besteht aus einer Zusammenfassung der Ergebnisse, die zur Veröffentlichung in der entsprechenden öffentlich zugänglichen Internetdatenbank für klinische Studien vorgesehen ist, dem Abschlussbericht der Studie und allen Veröffentlichungsmanuskripten oder den Abstracts / Poster / Präsentationen, die für wissenschaftliche Kongresse vorgesehen sind.
1. Die hier erwähnten Zahlungen von Ferring gehen nach Rechnungstellung an das Drittmittelkonto des folgenden Empfängers:

Asklepios Kliniken Hamburg GmbH  
ASKLEPIOS proresearch

Verwendungszweck: : #3001

Kontoverbindung (IBAN): DE98500800000090498300

2. Die Institution muss MISODEL® („Studienmedikament“) aus handelsüblichen Quellen beziehen, um es in Verbindung mit dem Forschungsprojekt zu verwenden.
3. Die Institution ist für alle Steuerverbindlichkeiten verantwortlich, die aus dem Erhalt der Finanzierung herrühren.
4. Finanzierungsbeträge, die nicht ausschließlich für dieses Forschungsprojekt verwendet werden, müssen an Ferring zurückgegeben werden.

## Artikel 4 – DATEN UND VERÖFFENTLICHUNG

1. Die Institution muss Ferring vor der direkten oder indirekten Freigabe an Dritte (die zuständige Aufsichtsbehörde ist hiervon ausgenommen) die Zusammenfassung der Ergebnisse des Forschungsprojektes, die zur Veröffentlichung in der entsprechenden öffentlich zugänglichen Internetdatenbank für klinische Studien vorgesehen ist, den Abschlussbericht der Studie und Veröffentlichungsmanuskripte oder Abstracts/Plakate/Folien für wissenschaftliche Kongresse zur Verfügung stellen.
- 1.1 Bestehende geistige Eigentumsrechte

Die Institution erkennt an, dass Ferring der alleinige Eigentümer aller in Zusammenhang mit dem Studienmedikamentes stehenden Rechte ist. Keine der in diesem Vertrag enthaltenen Regelungen ist dahingehend auszulegen, dass der Institution implizit oder anderweitig Rechte oder Lizenzen im Hinblick auf das Studienmedikament zugesprochen werden. Dies gilt auch für alle Patentanmeldungen, Patente, Patentansprüche, die jetzt oder später gestellt oder erteilt werden, oder alle sonstigen geistigen Eigentumsrechte im Hinblick auf das Studienmedikament. Die Institution verpflichtet sich dazu, davon abzusehen, Schutzrechtsanmeldungen vorzunehmen oder anderweitig Eigentums- oder Schutzrechte geltend zu machen.

# VEREINBARUNG ÜBER EINE PRÜFER-INITIIERTE STUDIE

## 1.2 Benachrichtigungspflicht der Institution gegenüber Ferring

Die Institution muss Ferring sofort alle das Studienmedikament betreffenden Ergebnisse aus dem Forschungsprojekt zur Verfügung stellen, die möglicherweise die Grundlage für eine Patentanmeldung und für neue Formen der Verabreichung, Anwendung und Herstellung des Studienmedikamentes sind.

## 1.3 Geistiges Eigentumsrecht von Ferring in Bezug auf das Forschungsprojekt und das Studienmedikament

Ferring ist alleiniger Inhaber aller gewerblichen und/oder geistigen Eigentumsrechte, zu denen unter anderem auch Erfindungen, Verbesserungen und Fachkenntnisse im Zusammenhang mit dem Studienmedikament gehören. Hierzu gehören unter anderem auch Arten der Rezeptur, Verabreichung, Anwendung oder Herstellung. Die Institution muss Ferring unverzüglich und ausführlich unter anderem über Erfindungen, Verbesserungen und Fachkenntnisse informieren und auf Anfrage von Ferring alle Daten zur Verfügung stellen, um die Interessen von Ferring hinsichtlich aller gewerblichen und/oder geistigen Eigentumsrechte zu wahren. Die Institution verpflichtet sich dazu, Ferring die Exklusivrechte für diese gewerblichen und/oder geistigen Eigentumsrechte zu gewähren, zu denen unter anderem auch Erfindungen, Verbesserungen und/oder Fachkenntnisse gehören. Die Institution ist damit einverstanden, in angemessener Weise alles zu tun, um den vorhergehenden Bestimmungen Geltung zu verschaffen und alle hierfür erforderlichen Dokumente gegen Erstattung der bei der Institution entstehenden Auslagen auszustellen.

## 1.4 Eigentum der Institution hinsichtlich des Forschungsprojektes – Vorbehaltlich der Bestimmung 1.1.

- 1.4.1 Alle Daten im Zusammenhang mit dem Forschungsprojekt gehören der Institution. Die Institution ist jedoch damit einverstanden, dass Ferring dazu berechtigt ist, diese Daten kostenlos zu welchem Zweck auch immer weltweit zu nutzen. Hierzu gehört unter anderem auch die Registrierung geistiger Eigentumsrechte, allerdings immer nur im zulässigen Umfang der geltenden Gesetzgebung und Vorschriften.
- 1.4.2 Darüber hinaus bestätigt die Institution, dass sie damit einverstanden ist, Nutzungsrechte zugunsten von Ferring zu vereinbaren, wenn die Institution irgendwelche gewerblichen und/oder geistigen Eigentumsrechte hinsichtlich des Forschungsprojektes erwirbt, die unabhängig vom Studienmedikament verwendet werden können. Einzelheiten werden zwischen den Vertragspartnern in einer Zusatzvereinbarung nach angemessenen branchenüblichen Bedingungen festgelegt.

## 1.5 Anerkennung der Übertragung geistiger Eigentumsrechte an Ferring

- 1.5.1 Die Institution erkennt an, dass alle gewerblichen und/oder geistigen Eigentumsrechte für Erfindungen, Verbesserungen und/oder Fachkenntnisse im Zusammenhang mit dem Studienmedikament auf Ferring übertragen werden. Hierzu gehören unter anderem auch die Art der Rezeptur, Verabreichung, Verwendung oder Herstellung des Studienmedikamentes.
  - 1.5.2 Die Institution sorgt dafür, dass der Prüfer durch die Unterzeichnung dieser Erklärung anerkennt, dass alle gewerblichen und/oder geistigen Eigentumsrechte für Erfindungen, Verbesserungen und/oder Fachkenntnisse im Zusammenhang mit dem Studienmedikament nach den Regeln des Arbeitnehmererfindungsrechts durch den Prüfer unverzüglich der Institution mitzuteilen sind und über diese auf Ferring übertragen werden. Hierzu gehören unter anderem auch die Art der Zubereitung, Verabreichung, Verwendung oder Herstellung des Studienmedikamentes.
  - 1.5.3 Die Institution verpflichtet sich, nur solche Prüfer und an dem Forschungsvorhaben beteiligten Personen für das Forschungsvorhaben einzusetzen, die die im Anhang B beigefügte Erklärung unterzeichnet haben.
- 1.6 Ferring wird etwaige Vergütungsansprüche unter den Voraussetzungen des Arbeitnehmererfindungsgesetzes tragen und die Institution von einer etwaigen Vergütungspflicht aus dem Arbeitnehmererfindungsgesetz freistellen.



# VEREINBARUNG ÜBER EINE PRÜFER-INITIIERTE STUDIE

## 1.7 Rechte Dritter

- 1.7.1 Bei der Durchführung des Forschungsprojektes wird kein Eigentum verwendet und hinsichtlich der Ergebnisse wird kein Eigentum eingeschlossen, dessen geistige Eigentumsrechte vollständig oder teilweise bei anderen Parteien als Ferring liegen.
2. Ferring ist dazu berechtigt, alle klinischen Daten aus dem Forschungsprojekt zu überprüfen. Hierzu gehören auch der Abschlussbericht der klinischen Studie, die Zusammenfassung der Ergebnisse, die zur Veröffentlichung in der entsprechenden öffentlich zugänglichen Internetdatenbank für klinische Studien vorgesehen ist, und sämtliche Veröffentlichungsmanuskripte oder Abstracts/Plakate/Folien für wissenschaftliche Kongresse. Die Institution muss Ferring die klinischen Daten und alle Manuskripte mindestens 30 (dreißig) Tage bevor diese eingereicht werden, zur Stellungnahme zur Verfügung stellen. Die Institution kann die schriftlichen Vorschläge oder Anmerkungen von Ferring nach eigenem Ermessen berücksichtigen. Ferring behält sich das Recht vor, der Institution zur Verschiebung der Veröffentlichung klinischer Daten aus dem Forschungsprojekt aufzufordern, damit etwaige Erfindungen durch Patente oder andere geeignete geistige Eigentumsrechte geschützt werden können. Die Institution wird dieser Aufforderung nachkommen. Unter diesen Umständen übernimmt Ferring die Kosten, die mit dem Schutz solcher Erfindungen einhergehen.
3. Die Institution ist damit einverstanden, in Veröffentlichungen oder Präsentationen im Zusammenhang mit dem Forschungsprojekt oder mit Ferring auf die Unterstützung durch Ferring hinzuweisen.
4. Soweit im Rahmen der lokal geltenden Gesetzen und Regularien erforderlich und möglich hat Ferring vollen Zugriff auf alle klinischen Daten aus dem Forschungsprojekt und ist dazu berechtigt, diese zu nutzen. Hierzu gehören auch Exklusivrechte zur Verwendung solcher Daten bei der Einreichung von Patentanmeldungen für das Studienmedikament.
5. Die Institution muss auf Anfrage von Ferring alle klinischen Daten bereitstellen und die Ergebnisse und Schlussfolgerungen der Behandlung aller Patienten, die nach Abschluss des Forschungsprojektes behandelt wurden, genau aufführen. Ferring kann diese Daten unter Umständen verwenden, um Patentanmeldungen zu ergänzen, zu unterstützen oder zu erstellen, die im Zusammenhang mit den Daten oder den Erfindungen aus dem Forschungsprojekt oder mit dem Studienmedikament eingereicht werden. Die Institution muss alle geltenden gesetzlichen Bestimmungen hinsichtlich der persönlichen Daten der Studienteilnehmer einhalten und darf Ferring unter keinen Umständen Informationen liefern, die Studienteilnehmer des Forschungsprojektes genau identifizieren.

## Artikel 5 – LAUFZEIT UND KÜNDIGUNG

1. Diese Vereinbarung gilt ab dem Datum, an dem Ferring die ordnungsgemäß ausgeführte, durch beide Parteien unterzeichnete und von der Institution bzw. dem Prüfer und den an der Studie Beteiligten anerkannte Vereinbarung erhält. Die Vereinbarung hat eine Laufzeit bis zum Datum, an dem das Forschungsprojekt beendet wird (siehe Anhang A) oder diese Vereinbarung gemäß den unten aufgeführten Regelungen gekündigt wird. Diese Vereinbarung verliert ihre Gültigkeit, wenn das Forschungsprojekt nicht innerhalb von 6 Monaten nach Erhalt der zustimmenden Bewertung der zuständigen Ethikkommission und ordnungsgemäße Unterzeichnung der Vereinbarung beginnt. In diesem Fall muss die bereits geleistete Unterstützung zurückgegeben werden.
2. Die Institution muss Ferring umgehend schriftlich über Verzögerungen der in den Forschungsunterlagen niedergelegten geplanten Dauer des Forschungsprojektes informieren.
3. Beide Parteien können diese Vereinbarung kündigen, wenn sie die jeweils andere Partei unter Einhaltung einer Frist von 90 Tagen schriftlich darüber benachrichtigen. Bei einer Kündigung werden etwaige noch ausstehende Zahlungen aus dieser Vereinbarung anteilig berechnet, und zwar auf Grundlage der tatsächlichen Arbeit, die zum Zeitpunkt der Kündigung in Übereinstimmung mit dem Forschungsprojekt ausgeführt wurde. Die Institution muss alle Geldmittel von Ferring zurückzahlen, die nicht direkt verwendet wurden, um das Forschungsprojekt zu unterstützen. Beide Parteien können diese Vereinbarung jederzeit kündigen, wenn es nach eigener Ansicht oder nach Ansicht der entsprechenden Aufsichtsbehörde oder Ethikkommission nicht ratsam ist, das Forschungsprojekt fortzusetzen.
4. Die Regelungen in den Artikeln 4, 6, 7 und 8 bleiben trotz der Beendigung oder Kündigung dieser Vereinbarung als zwischen den Parteien geltende Regelungen in Kraft.



# VEREINBARUNG ÜBER EINE PRÜFER-INITIIERTE STUDIE

## Artikel 6 - GEHEIMHALTUNG

1. Die Institution wird während oder nach Ablauf der Vereinbarung ohne vorherige schriftliche Genehmigung von Ferring keinerlei geheimen oder vertraulichen Informationen von Ferring, dessen verbundenen Unternehmen oder Handelspartnern an Dritte weitergeben, es sei denn, dies ist für die Ausführung der Vereinbarung durch die Institution erforderlich. Dies betrifft Informationen, die die Institution bei der Durchführung des hier erwähnten Forschungsprojektes erhalten hat. Hierzu gehören unter anderem Informationen zu Erfindungen, Produkten, Verfahren, Methoden, Techniken, Formeln, Zusammensetzungen, Mischungen, Projekten, Entwicklungsplänen, Forschungsarbeiten, Daten, klinischen Daten, Finanzdaten, Anlegerbeziehungen, potenziellen Investoren, Finanzierungsvereinbarungen, persönlichen Daten, Computerprogrammen, Kunden- und Lieferantenlisten oder Organisationen oder Einzelpersonen, Forschungsarbeiten, gewerblichen oder sonstigen Aktivitäten ("vertrauliche Informationen"). (Mit „verbundenen Unternehmen“ einer Partei sind in dieser Vereinbarung alle Rechtsträger gemeint, die diese Partei kontrollieren, von ihr kontrolliert werden oder gemeinsam kontrolliert werden.)
2. Die Institution darf vertrauliche Informationen nur an Personen weitergeben, die sie damit beauftragt, Teile des Forschungsprojektes auszuführen. Dabei gilt das Need-to-know-Prinzip (Kenntnis nur bei Bedarf). Die Institution ist dafür verantwortlich, dass diese Personen im gleichen Umfang wie die Institution zur Geheimhaltung verpflichtet werden. Die Institution ist gegenüber Ferring für Handlungen oder Versäumnisse dieser Personen, die vertrauliche Informationen erhalten haben, in dem Umfang uneingeschränkt haftbar, als ob es sich um Handlungen oder Versäumnisse der Institution handeln würde.
3. Als vertrauliche Informationen gelten nicht solche Informationen, die nachweislich
  - a) offenkundig sind oder zum bekannten Stand der Technik / Wissenschaft gehören oder
  - b) der Institution schon vor der Bekanntgabe durch Ferring zur Kenntnis gelangt waren oder
  - c) der Institution nach der Bekanntgabe durch Ferring nochmals durch Dritte, die keiner Geheimhaltungspflicht gegenüber Ferring unterliegen, mitgeteilt worden sind oder
  - d) aufgrund gesetzlicher Bestimmungen oder gerichtlicher Anordnung durch der Institution offenzulegen sind. In diesem Fall wird die Institution Ferring rechtzeitig über die Offenlegungspflicht informieren und Ferring bei der Durchsetzung der Geheimhaltungsinteressen unterstützen.
4. Gleichzeitig verpflichtet sich Ferring in dem in Absätzen 6(1) - 6(3) genannten Umfang über alle über die Institution erlangten Informationen (insbesondere Geschäfts- und Betriebsgeheimnisse) Stillschweigen zu bewahren.

## Artikel 7 – HAFTUNG, SCHADENERSATZ UND GARANTIE

1. Für indirekte, unverschuldete oder mittelbare Verluste oder Schäden jeglicher Art sind die Parteien im Rahmen dieser Vereinbarung unter keinen Umständen gegenüber der anderen Partei haftbar oder verantwortlich. Dies gilt für Verluste und Schäden der Parteien und deren Mitarbeiter. Hierzu gehören unter anderem alle tatsächlichen oder erwarteten Gewinne, Zeitverluste, Bagatellschäden, Geschäftsverluste der Parteien oder alle anderen ähnlichen Verluste. Der Haftungsausschluss gilt nicht für Verluste und Schäden, die auf einer Verletzung wesentlicher Vertragspflichten, d.h. solcher Pflichten die für die Vertragserfüllung wesentlich sind, oder auf fahrlässigem oder vorsätzliches Verhalten von Angestellten oder Beauftragten oder Dritten, die eine der Vertragsparteien beauftragt hat, um einen Teil des Forschungsprojektes auszuführen oder den hier erwähnten Verpflichtungen nachzukommen, beruhen. Der Haftungsausschluss gilt ferner nicht für Schäden und Verluste, die durch grob fahrlässiges oder vorsätzliches Verhalten entstehen und soweit es sich um Ansprüche aufgrund der Verletzung des Lebens, des Körpers oder der Gesundheit oder um Ansprüche nach dem Produkthaftungsgesetz handelt.
2. Die Vertragsparteien haften für die von ihnen verursachten Schäden selbst. Ferring ist gemäß den geltenden zwingenden Produkthaftungsnormen für das Studienmedikament verantwortlich.



# VEREINBARUNG ÜBER EINE PRÜFER-INITIIERTE STUDIE

Die Institution erklärt und garantiert Folgendes:

- (i) Dass sie über die im Rahmen dieser Vereinbarung notwendige Erfahrung für die Ausführung des Forschungsprojektes verfügt und dass sie über die notwendige Ausrüstung und die notwendigen Personalkapazitäten verfügt, um das Forschungsprojekt erfolgreich durchzuführen;
- (ii) dass sie das Forschungsprojekt durchführen und dabei sorgfältig entsprechende Fachkenntnisse verwenden wird, um ihren hierin enthaltenen Verpflichtungen auf professionelle und zügige Art und Weise und in Übereinstimmung mit den Vertragsbedingungen dieser Vereinbarung und des Anhangs nachzukommen;
- (iii) dass die Durchführung des Forschungsprojektes gemäß allen geltenden Gesetzen und Vorschriften erfolgt;
- (iv) dass sie gegenüber Ferring die volle Verantwortung trägt für Handlungen und Versäumnisse der Mitarbeiter und Beauftragten sowie Dritter, die sie im Rahmen dieser Vereinbarung beauftragt. Hierzu gehören unter anderem auch die Verpflichtungen der Institution hinsichtlich der Geheimhaltung und Veröffentlichung von Erfindungen und Entdeckungen;
- (v) dass sie Ferring unerwünschte Ereignisse unter strikter Einhaltung der einvernehmlichen Absprache mit Ferring meldet, wenn diese festgestellt werden.

## Artikel 8 – Allgemeine Bestimmungen

1. Diese Vereinbarung untersteht dem deutschen Recht ohne Rückgriff auf die Regelungen des UN-Kaufrechts. Gerichtsstand ist der Gesetzliche.
2. Keine der Parteien darf ohne vorherige schriftliche Genehmigung der anderen Partei Ansprüche, Verpflichtungen oder Rechte aus dieser Vereinbarung abtreten oder übertragen oder Geldforderungen abtreten, die infolge dieser Vereinbarung fällig sind oder fällig werden. Ungeachtet gegenteiliger Bedingungen dieser Vereinbarung ist Ferring jedoch immer dazu berechtigt, ohne Genehmigung die Institution Ansprüche, Verpflichtungen oder Rechte aus dieser Vereinbarung an ein verbundenes Unternehmen abzutreten oder zu übertragen sowie Geldforderungen an ein verbundenes Unternehmen abzutreten, die infolge dieser Vereinbarung fällig sind oder fällig werden („verbundenes Unternehmen“ sind alle Rechtsträger, die Ferring kontrollieren, von Ferring kontrolliert werden oder gemeinsam mit Ferring kontrolliert werden).
3. Die Institution muss alle Aufzeichnungen, Geschäftsbücher, Konten und sonstigen Dokumente und Informationsquellen im Zusammenhang mit dem Forschungsprojekt und der Unterstützung durch Ferring aufbewahren. Hierzu gehören unter anderem auch Aufzeichnungen zu angemeldeten Studienteilnehmern und zur Zeit und den Kosten, die bei der Ausführung des Forschungsprojektes aufgewendet wurden bzw. angefallen sind.
4. Die Beziehung der Institution zu Ferring ist die eines unabhängigen Anbieters und nicht die eines Angestellten, Partners, Beauftragten oder Mitunternehmers von Ferring. Die Parteien sind sich darüber einig, dass mit dem Vertragsschluss keinerlei Einfluss auf Umsatzgeschäfte, insbesondere Beschaffungsvorgänge / Preisgestaltungen genommen wird und auch keinerlei diesbezüglichen Erwartungen bestehen. Insbesondere besteht auf der Seite von Ferring keine Erwartung, dass die Institution Produkte von Ferring bevorzugt abnehmen bzw. einsetzen wird.
5. Diese Vereinbarung stellt die Absprache der Parteien im Hinblick auf den Vertragsgegenstand dar. Die Vertragsbedingungen dürfen nur in schriftlicher Form geändert oder modifiziert werden. Diese Änderung oder Modifizierung ist von beiden Parteien zu unterzeichnen.
6. Diese Vereinbarung ist bindend und tritt im Interesse der Parteien und deren jeweiligem rechtmäßigen Nachfolger in Kraft.
7. Stellt sich heraus, dass Bestimmungen dieser Vereinbarung in einer Gerichtsbarkeit nicht wirksam oder nicht einklagbar sind, verlieren sie hinsichtlich dieser Hinfälligkeit oder Nichteinklagbarkeit in dieser Gerichtsbarkeit ihre Gültigkeit. Die restlichen Bestimmungen der Vereinbarung bleiben jedoch weiterhin wirksam und einklagbar. Des Weiteren hat dies keine Auswirkungen auf die Wirksamkeit oder Einklagbarkeit dieser Vereinbarung in anderen Gerichtsbarkeiten. Um nicht wirksame oder nicht einklagbare Bestimmungen zu ersetzen, müssen sich die Parteien nach besten Kräften darum bemühen, eine wirksame und einklagbare Bestimmung zu vereinbaren und dabei die ursprünglichen Absichten der Parteien berücksichtigen.

# VEREINBARUNG ÜBER EINE PRÜFER-INITIIERTE STUDIE

8. Diese Vereinbarung kann in mehreren Ausfertigungen erstellt werden. Alle Ausfertigungen gelten als Original und haben die gleiche Gültigkeit und Wirksamkeit. Zusammengenommen bilden sie jedoch ein und dasselbe Dokument.

| Asklepios Kliniken Hamburg GmbH<br>ASKLEPIOS proresearch                                                                        | Ferring Arzneimittel GmbH                                                                          |
|---------------------------------------------------------------------------------------------------------------------------------|----------------------------------------------------------------------------------------------------|
| Ich habe diese Vereinbarung gelesen und verstanden und bestätige und akzeptiere<br>meine daraus hervorgehenden Verpflichtungen. |                                                                                                    |
| 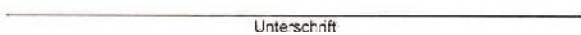<br>Unterschrift                               | <br>Unterschrift |
| Name: Prof. Dr. med. Andrea Morgner-Miehlke, MÄHM<br>Manager ASKLEPIOS proresearch                                              | Name: Dr. med. Birgit Daglinger                                                                    |
|                                                                                                                                 | Titel: Geschäftsführerin                                                                           |
| Datum: _____                                                                                                                    | Datum: 09/02/2015                                                                                  |
| <br>Unterschrift                               | <br>Unterschrift |
| Name: Gabriele Oeynhausen                                                                                                       | Name: Dr. Sabina<br>Cepelis-Kasinor                                                                |
| Titel: Vertragsmanagerin ASKLEPIOS proresearch                                                                                  | Titel: Manager Klinische Forschung                                                                 |
| Datum: 18.02.15                                                                                                                 | Datum: 9.2.15                                                                                      |
| Gelesen und zur Kenntnis genommen:                                                                                              |                                                                                                    |
| <br>Unterschrift                             |                                                                                                    |
| Name: Prof. Dr. med. univ. Peter Schwärzler                                                                                     |                                                                                                    |
| Titel: Chefarzt Geburtshilfe und Pränatalmedizin                                                                                |                                                                                                    |
| Datum: _____                                                                                                                    |                                                                                                    |



# VEREINBARUNG ÜBER EINE PRÜFER-INITIIERTE STUDIE

Anhang A: Beschreibung des Forschungsprojektes (d. h. das Studienprotokoll und gegebenenfalls andere forschungsrelevante Informationen)

Anhang B: Erklärung der an der Studie Beteiligten

# VEREINBARUNG ÜBER EINE PRÜFER-INITIIERTE STUDIE

## ANHANG B

### Erklärung der an der Studie Beteiligten

Mit der Unterschrift unter diese Erklärung verpflichte ich mich freiwillig und ohne, dass mich die Institution dazu verpflichtet hat, gegenüber Ferring auf alle Rechte, die mir aus § 42 Nr. 1, 2 und 3 des Arbeitnehmererfindergesetzes zustehen, zu verzichten und die Institution unverzüglich über alle Erfindungen in Einklang mit § 5 des Arbeitnehmererfindergesetzes zu informieren und die Erfindung über die Institution gemäß den Bestimmungen des Arbeitnehmererfindergesetzes auf Ferring zu übertragen und Ferring die Nutzung dieser Rechte uneingeschränkt zu gestatten.

Unterschrift \_\_\_\_\_

Name:

Titel:

Datum:
