# Supplementary material for: Safety of misoprostol vaginal insert for labor induction using standard vs. adjusted retrieval criteria: a comparative cohort study
Source: publisher site journal article supplement (doi:10.1515/jpm-2020-0071), 2020-05-14
Supplement: Supplementary file 2 [file Ethical committee approval.pdf › Supplement/Ethical committee approval.pdf]

Ärztchammer Hamburg · Postfach 76 01 09 · 22051 Hamburg

Herrn  
Dr. med. univ. Peter Schwärzler  
Gynäkologie und Geburtshilfe  
Asklepios Klinik Barmbek  
Rübenkamp 220  
22291 Hamburg

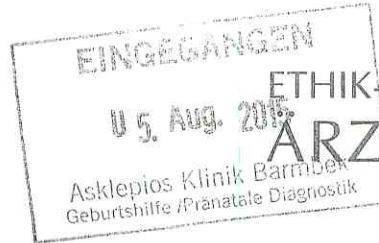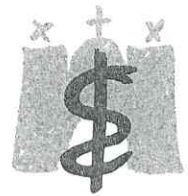

ETHIK-KOMMISSION DER  
ÄRZTEKAMMER  
HAMBURG

Körperschaft des öffentlichen Rechts

04.08.2015  
Ha/CSt

**Bearb.-Nr.: PV4803-2 (Bitte stets angeben!)**  
**Studientitel: Anwendungsbeobachtung von Misoprostol Vaginalinsert (Misodel®)**

Sehr geehrter Herr Kollege Schwärzler,

über Ihr oben bezeichnetes, zur Primärberatung vorgelegtes Projekt hat die Ethik-Kommission in ihrer Sitzung am 28.07.2015 erneut ausführlich beraten.

**Die Ethik-Kommission stimmt dem Vorhaben zu, hat aber folgende ethischen und fachrechtlichen Bedenken, die eine Überarbeitung in folgenden Punkten vor Beginn erforderlich machen:**

1. Der Begriff „Anwendungsbeobachtung“ ist problematisch. Die (prospektive) Anwendungsbeobachtung zugelassener Arzneimittel ist gemäß § 67 Abs. 6 Arzneimittelgesetz anzeigepflichtig.
2. Laut den Angaben im Fragenkatalog handelt es sich um eine retrospektive Datenauswertung. Das Studienprotokoll enthält weiterhin Anklänge an eine prospektive Studie (Punkt 10 – 13). Die Angaben sind zu harmonisieren.
3. Die Angaben zum Datenschutz müssen noch einmal geprüft werden. Laut Punkt 7 des Fragenkatalogs und der Information liegen die Daten in *anonymisierter* Form vor. Laut Protokollseite 5 (Punkt 16) erfolgt die Nutzung der Daten in *pseudonymisierter* Form. Die Angaben sollten harmonisiert werden.
4. Unter Punkt 3.1 des Fragenkatalogs sollten die Daten zum Studienablauf aktualisiert werden.
5. Zudem bleibt unklar, ob der Doktorand zu den in § 12 Abs. 2 Nr. 2 Hamburgisches Krankenhausgesetz genannten Mitarbeitern der Klinik gehört oder nicht. Hiervon abhängig ist die Frage des notwendigen Aufklärungs- und Einwilligungsumfangs bzw. dem Ausreichen einer Information der Betroffenen in reduzierter Weise.
6. Die Voraussetzungen nach § 12 Abs. 3 des Hamburgischen Krankenhaus-gesetzes müssen erfüllt werden.

...2

7. Die Patientinneninformation und Einwilligungserklärung ist in den folgenden Punkten zu überarbeiten:
- a) Die Information wird dem Vorhaben einer retrospektiven Datenerhebung entgegen der Stellungnahme des Antragstellers vom 16.06.2015 weiterhin nicht gerecht. Sie richtet sich an Patientinnen, bei denen die Geburtseinleitung bevorsteht. Das Dokument ist entsprechend zu überarbeiten.
  - b) Es fehlt eine Kopfzeile mit den Angaben zum Zentrum, des verantwortlichen Arztes und allen Kontaktdaten (inklusive Telefonnummer).
  - c) Der Titel der Studie ist zu ergänzen. Dieser sollte auf allen Dokumenten identisch mit dem des Protokolls sein, um eine Zuordnung jederzeit gewährleisten zu können. Eine laienverständliche Umschreibung könnte diese im Bedarfsfall ergänzend untertiteln.
  - d) Es fehlt der Hinweis auf die Freiwilligkeit zur Teilnahme.
  - e) Ziel und Zweck der Studie müssen den Teilnehmern laienverständlich und ausführlich erläutert werden.
  - f) Die Patientinnen sind darüber aufzuklären, dass sie zu jeder Zeit das Recht auf Widerruf ihrer Teilnahme ohne Angabe von Gründen haben und dass ihnen daraus keinerlei Nachteile entstehen dürfen.
  - g) Das Verfahren mit Daten bei Widerruf sollte ergänzt werden.
  - h) Mögliche Nebenwirkungen sollten genannt werden.
  - i) Der Datenschutzpassus sollte sich optisch vom übrigen Text abgrenzen.
  - j) Die Begriffe „anonymisiert“ und „pseudonymisiert“ sollten laienverständlich erklärt werden.
  - k) Es sollten die Verantwortlichen, die Zugang zu der Pseudonymisierungsliste haben namentlich benannt werden.
  - l) Die Aufbewahrungsfrist sollte genannt werden.

Wir möchten in diesem Zusammenhang noch einmal auf die Inhaltsempfehlungen und das Datenschutzmuster der Ethik-Kommission verweisen. Beide Dokumente sind auf unserer Homepage verfügbar.

**Die Beratung durch die Ethik-Kommission ist mit diesem Schreiben abgeschlossen. Entsprechend überarbeitete Unterlagen müssen nicht erneut vorgelegt werden.**

Die Kommission weist darauf hin, dass die Verantwortung des Versuchsleiters für das Forschungsvorhaben und seine Durchführung durch das obige Votum der Kommission nicht berührt wird.

Für den Fall der Durchführung der Studie in Zentren anderer Kammerbereiche geht die Kommission von der Einbindung der lokal zuständigen Ethik-Kommission aus.

Die Kommission geht davon aus, dass die personenbezogenen Daten der Probanden / Patienten den datenschutzrechtlichen Vorschriften entsprechend behandelt werden.

Die Ethik-Kommission erwartet, dass ihr nach Abschluss des Projektes unaufgefordert ein Abschluss-Bericht übersandt wird (unter Angabe der Bearb.-Nr.), aus dem der Erfolg/Misserfolg der Studie sowie Angaben darüber, ob die Studie abgebrochen oder geändert bzw. ob Regressansprüche geltend gemacht wurden, ersichtlich sind.

Mit verbindlicher Empfehlung  
im Auftrage der Kommission

  
Prof. Dr. med. M. Carstensen  
- Stellv. Vorsitzender -

P.S. Die Ethik-Kommission arbeitet auf der Grundlage deutschen Rechts und Berufsrechts sowie in Anlehnung an die ICH-GCP.
